## **IN VIVO ANALYSIS OF GAS TRANSPORT IN ARTERIAL AND VENOUS BLOOD OF THE SEA LAMPREY *PETROMYZON MARINUS***

BY B. L. TUFTS, B. BAGATTO AND B. CAMERON

*Department of Biology, Queen's University, Kingston, Ontario,  
Canada K7L 3N6*

*Accepted 14 April 1992*

### **Summary**

Exercise in sea lampreys resulted in a significant decrease in the extracellular pH (pHe) in both arterial and venous blood. At rest, the erythrocyte pH (pHi) of venous blood was significantly greater than the pHi of arterial blood. Despite the considerable extracellular acidosis after exercise, both arterial and venous pHi were maintained throughout the recovery period. In the venous blood, there was a reversal of the pH gradient ( $\Delta$ pH) across the erythrocyte membrane immediately after exercise. Exercise also resulted in significant reductions in the partial pressure of oxygen and hemoglobin oxygen-carriage and a significant increase in the partial pressure of CO<sub>2</sub> in arterial and venous blood. Although the total CO<sub>2</sub> concentration of the plasma decreased after exercise, erythrocyte total CO<sub>2</sub> concentrations ( $C_{\text{CO}_2,i}$ ) increased. In venous blood, the  $C_{\text{CO}_2,i}$  immediately after exercise was double the resting value. At rest, partitioning of the total CO<sub>2</sub> content between plasma and erythrocytes indicated that 16% and 22% of the total CO<sub>2</sub> could be attributed to the erythrocytes in arterial and venous whole blood, respectively. After exercise, these percentages increased to 25% (arterial) and 38% (venous). Changes in  $C_{\text{CO}_2,i}$  accounted for 62% of the arteriovenous difference in whole-blood total CO<sub>2</sub> at rest. This increased to 78% immediately after exercise. Thus, unlike other vertebrates, CO<sub>2</sub> transport in the lamprey *in vivo* is largely dependent on erythrocyte CO<sub>2</sub>-carriage.

### **Introduction**

The characteristics of carbon dioxide transport in blood have been thoroughly described in a number of vertebrates both *in vitro* and *in vivo*. *In vitro*, CO<sub>2</sub> carriage has often been examined within the different compartments; whole blood, true plasma and red blood cells. Typically, this analysis indicates that the total carbon dioxide concentration of true plasma is considerably greater than that of the erythrocytes over a range of CO<sub>2</sub> tensions (Roughton, 1964; Boutilier *et al.* 1979; Heming, 1984). *In vivo*, changes in the total CO<sub>2</sub> content of the plasma

Key words: carbon dioxide, erythrocyte, plasma, blood, lamprey, exercise, *Petromyzon marinus*.

during passage of blood through the respiratory organ also account for the majority of the CO<sub>2</sub> excreted in those vertebrates studied to date (Roughton, 1964; Heming, 1984; Klocke, 1987). Thus, the plasma has a prominent role in CO<sub>2</sub> carriage in the blood of most vertebrates.

Recent studies have demonstrated that the *in vitro* CO<sub>2</sub> transport properties of lamprey blood are markedly different from those of other vertebrates (Tufts and Boutilier, 1989, 1990; Nikinmaa and Matsoff, 1991). In lampreys, the total CO<sub>2</sub> content of the erythrocytes exceeds that of true plasma as CO<sub>2</sub> tensions are increased *in vitro* (Tufts and Boutilier, 1989, 1990). These results may be attributable to reduced quantities of chloride/bicarbonate exchange protein in the erythrocyte membrane of agnathans (Nikinmaa and Railo, 1977; Ellory *et al.* 1977). In most vertebrates, a large amount of the bicarbonate formed within the erythrocyte after the hydration of CO<sub>2</sub> is rapidly transferred to the plasma in exchange for chloride *via* the chloride/bicarbonate exchange protein, capnophorin (Band 3), within the erythrocyte membrane (Swenson, 1990). Thus, chloride/bicarbonate exchange reduces the total CO<sub>2</sub> content of the erythrocyte and increases that of the plasma at any given CO<sub>2</sub> tension. In lampreys, sodium-dependent movements of protons across the erythrocyte membrane may also contribute to the unique CO<sub>2</sub> transport properties of blood observed *in vitro* (Tufts, 1992). The relative importance of these two factors has not been clearly determined.

Based on the blood CO<sub>2</sub> transport properties observed *in vitro*, Tufts and Boutilier (1989) proposed that CO<sub>2</sub> transport in lampreys is largely dependent on CO<sub>2</sub> carriage by the erythrocyte rather than by the plasma. The reverse is true for most vertebrates. In view of the phylogenetically primitive position of these animals, such a novel strategy for CO<sub>2</sub> transport may provide important insights towards understanding the evolution of gas transport in vertebrates. Indeed, one can predict that transport of carbon dioxide within the erythrocyte may have important consequences for the coupling of oxygen and carbon dioxide transport. To date, however, there have been no detailed investigations of gas transport in lampreys *in vivo*. Consequently, the purpose of the present study was to examine blood gas transport in both arterial and venous blood of the sea lamprey, *Petromyzon marinus*, at rest and during recovery from exercise.

### Materials and methods

Adult sea lampreys, *Petromyzon marinus* (L.) (250–400 g; *N*=12), were collected during their spawning migration in the Shelter Valley River in Eastern Ontario. The animals were transported to the Biology Department at Queen's University where they were held in freshwater tanks at 8–10°C for at least 2 weeks before experiments. The composition of the water used to hold the animals and in the experiments was as follows (mequiv l<sup>-1</sup>): [Na<sup>+</sup>] 2.1; [K<sup>+</sup>] 0.05, [Ca<sup>2+</sup>] 2.2, [Cl<sup>-</sup>] 1.3, [HCO<sub>3</sub><sup>-</sup>] 1.5, pH 7.4.

### *Surgery*

Lampreys were anesthetized in an aerated and pH-balanced solution of tricaine methane sulfonate ( $66.7 \text{ mg l}^{-1}$  MS-222 and  $1333 \text{ mg l}^{-1}$   $\text{NaHCO}_3$ ). The animals were then transferred to a surgical table and a mid-ventral incision (3–4 cm) was made approximately half-way down the body. Cannulae of polyethylene tubing (PE 50) were implanted in the dorsal aorta and the posterior cardinal vein. It was not feasible to sample prebranchial blood from the ventral aorta because of the extensive network of cartilage and blood vessels associated with the gill pouches, but blood from the posterior cardinal vein empties into the sinus venosus of the heart and these samples should therefore be similar to prebranchial blood. The cannulae extended through the incision, which was then closed with sutures. During the surgical procedure, the lamprey's body was wrapped in a damp cloth and the head and gills were kept moist by intermittent immersion in the anesthetic solution. Following the 5–10 min surgery, the lampreys were allowed to recover in a lightproof Perspex box containing aerated flowing fresh water at  $10^\circ\text{C}$  for at least 24 h before experiments.

### *Protocol*

After recovery,  $600 \mu\text{l}$  blood samples were taken into Hamilton gas-tight syringes from both the arterial and venous cannulae. Whole-blood total carbon dioxide concentration was measured immediately on  $100 \mu\text{l}$  of the sample. Triplicate hematocrit measurements were made using  $200 \mu\text{l}$  of blood and the remainder was dispensed into 0.5 ml Eppendorf tubes and centrifuged at  $10\,000 g$  for 4 min at  $10^\circ\text{C}$ . The  $C_{\text{CO}_2}$  of true plasma was then determined on a  $100 \mu\text{l}$  sample of plasma taken from the hematocrit tubes using a  $100 \mu\text{l}$  gas-tight Hamilton syringe. Plasma pH (pHe) was measured immediately from the supernatant in the Eppendorf tube. The remaining plasma was removed from the tube and the pellet was frozen in liquid nitrogen before determination of erythrocyte pH (pHi).

After the control sample had been taken, the lamprey was moved to a cylindrical tank containing aerated water at  $10^\circ\text{C}$ , where it was manually chased to exhaustion in 5 min. The exhausted lamprey was then returned to the Perspex container and a second  $600 \mu\text{l}$  sample was removed from each cannula. Identical analyses to those described for the control sample were performed on this blood sample. Additional samples were also taken at 0.5, 1 and 4 h of recovery from exercise. Throughout the experiment, blood samples were replaced with a similar volume of heparinized ( $20 \text{ i.u. ml}^{-1}$ ) saline after both the arterial and venous samples had been taken.

In a second series of experiments, lampreys were also cannulated in the dorsal aorta and the posterior cardinal vein. After recovery, 1 ml samples of blood were taken into Hamilton gas-tight syringes. The whole-blood oxygen content ( $C_{\text{O}_2}$ ) and oxygen tension ( $P_{\text{O}_2}$ ) were measured immediately using about  $300 \mu\text{l}$  of these samples. Another  $50 \mu\text{l}$  of whole blood was used to determine hemoglobin concentration. The remaining blood from each syringe was divided equally between two 0.5 ml Eppendorf tubes and centrifuged. After centrifugation,  $200 \mu\text{l}$

of plasma supernatant was removed from the tubes and frozen for later analysis of plasma  $\text{Cl}^-$  concentrations. Any remaining plasma was discarded and the red blood cell pellets were saved for the determination of erythrocyte water content and  $\text{Cl}^-$  concentrations. As in the first series of experiments, lampreys were exercised to exhaustion after the control sample. A 1 ml sample was removed from each cannula as soon as the lamprey was returned to the Perspex box. These post-exercise samples were treated in an identical manner to the control samples. Samples were also taken after 0.5, 1 and 4 h of recovery. However, at these times, only 350  $\mu\text{l}$  was removed from each cannula and only  $C_{\text{O}_2}$ ,  $P_{\text{O}_2}$  and hemoglobin were analyzed. Thus, in both series of experiments about 5 ml of blood was removed from each animal. In a previous study, Tufts (1991) demonstrated that this sampling protocol would not significantly affect the variables measured in the present experiments.

#### Analyses

Plasma pH (pHe) and erythrocyte pH (pHi) were determined with a PHM 73 pH meter and associated micro-pH unit (Radiometer, Copenhagen, Denmark) thermostatted at 10°C. Erythrocyte pellets were frozen and thawed twice in liquid nitrogen prior to the determination of pHi according to the method of Zeidler and Kim (1977). The whole-blood  $P_{\text{O}_2}$  was measured with an E5046 oxygen electrode (Radiometer, Copenhagen, Denmark), also thermostatted at 10°C, and an associated oxygen meter (Cameron Instrument Co., Texas, USA). Another E5046 oxygen electrode was used to determine the total oxygen content ( $C_{\text{O}_2}$ ) of whole-blood samples using the method of Tucker (1967). Total  $\text{CO}_2$  concentrations ( $C_{\text{CO}_2}$ ) of whole blood and plasma were measured with a Corning model 965  $\text{CO}_2$  analyzer (Ciba Corning Canada Inc.). Analysis of hemoglobin concentration was performed by Drabkin's method (Drabkin and Austin, 1935) using Sigma reagents. For the determination of erythrocyte chloride concentration, the erythrocyte pellet was first dissolved in 8% perchloric acid. The chloride concentration of the extract was then measured with a CMT 10 chloride titrator (Radiometer, Copenhagen).

Erythrocyte  $C_{\text{CO}_2}$  concentration ( $C_{\text{CO}_2,i}$ ) was determined from the  $C_{\text{CO}_2}$  of whole blood (w.bl.) and true plasma (t.pl.) and the hematocrit (Hct) according to the following equation:

$$C_{\text{CO}_2,i} = [C_{\text{CO}_2,w.bl} - C_{\text{CO}_2,t.pl.} \times (1 - \text{Hct})] / \text{Hct}.$$

Measured values of true-plasma total  $\text{CO}_2$  and pHe were used to determine the partial pressure of  $\text{CO}_2$  ( $P_{\text{CO}_2}$ ) via a rearrangement of the Henderson-Hasselbalch equation with the values for  $\text{pK}'$  determined according to Boutilier *et al.* (1984) and a  $\text{CO}_2$  solubility coefficient ( $\alpha_{\text{CO}_2}$ ) of  $8.29 \times 10^{-3} \text{ mmol kPa}^{-1}$  (Tufts and Boutilier, 1990).

#### Statistics

Means and standard errors of all values are presented. A repeated-measures

analysis of variance (ANOVA) was used to assess the significance of observed differences between sample times. If the ANOVA indicated significance ( $P < 0.05$ ), a Dunnett's multiple comparisons test was then used to determine significant differences ( $P < 0.05$ ) between resting values and post-exercise values. A paired Student's *t*-test was also used to assess the significance ( $P < 0.05$ ) of observed differences in plasma and erythrocyte chloride concentrations and erythrocyte water content between arterial and venous blood.

### Results

Under resting conditions, arterial extracellular pH (pHe) in the sea lamprey was  $8.040 \pm 0.027$  while the venous pHe was significantly lower at  $7.965 \pm 0.025$  (Fig. 1A). Exhaustive exercise caused significant decreases of 0.363 and 0.455 pH units in arterial and venous pHe, respectively. Arterial pHe recovered rapidly during the post-exercise period and by 1 h had returned to  $7.961 \pm 0.052$ , which was no longer significantly different from the resting value. Recovery of venous pHe was somewhat slower, however, and it remained significantly below the resting value until the 4 h sample.

At rest, the erythrocyte pH (pHi) of venous blood was  $7.647 \pm 0.021$  whereas that of arterial blood was significantly less at  $7.509 \pm 0.030$  (Fig. 1B). Thus, the pHi of venous blood was higher than that of arterial blood even though the venous pHe was more acidic than arterial pHe. Despite the considerable extracellular acidosis, there were no significant differences in either the arterial or venous pHi following exhaustive exercise. Maintenance of pHi resulted in very large changes in the pH gradient across the red blood cell membrane after exercise (Fig. 1C). Indeed, there was a reversal of the pH gradient in venous blood, which was  $-0.165 \pm 0.061$  pH units immediately after exercise.

Venous  $P_{O_2}$  at rest was about 35 % of the arterial  $P_{O_2}$  (Fig. 2A). Passage of blood through the tissues under resting conditions was also associated with a 23 % reduction in haemoglobin oxygen-carriage by venous blood (Fig. 2B). Arterial and venous  $P_{O_2}$  fell after exercise by 48 % and 76 %, respectively. In arterial blood, this resulted in a 22 % decrease in haemoglobin oxygen-carriage whereas the post-exercise decline in venous haemoglobin oxygen-carriage was 76 % at 0 h. Recovery of these variables was very rapid, however, and by 30 min of recovery, there were no longer significant differences from resting values.

Exhaustive exercise also resulted in significant increases in the  $P_{CO_2}$  of both arterial and venous blood of 0.17 and 0.39 kPa, respectively (Fig. 3). Similar to the observed changes in pHe, the  $P_{CO_2}$  difference between arterial and venous blood was considerably greater after exercise. By 1 h of recovery, the  $P_{CO_2}$  in both compartments had returned to values not significantly different from rest.

The total  $CO_2$  concentration of plasma ( $C_{CO_2,t.pl.}$ ) of both arterial and venous blood decreased significantly after exhaustive exercise (Fig. 4A). In each case, the magnitude of the decrease was  $1.4 \text{ mmol l}^{-1}$  at 0 h. Arterial  $C_{CO_2,t.pl.}$  did not recover until the 1 h sample, but venous  $C_{CO_2,t.pl.}$  was no longer significantly

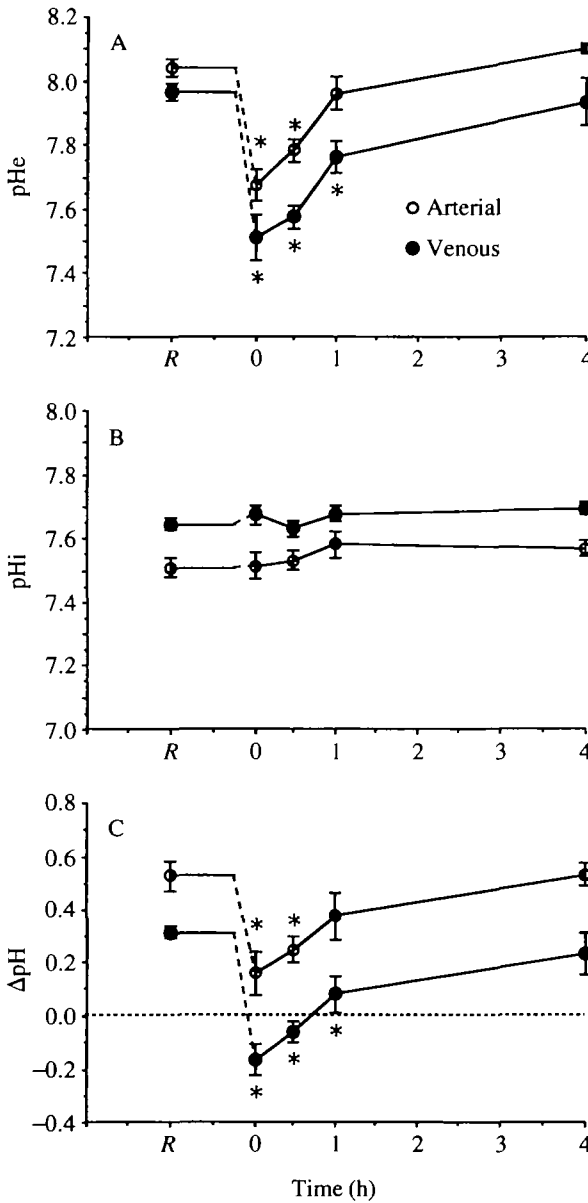

Fig. 1. (A) Extracellular pH (pHe), (B) erythrocyte pH (pHi) and (C) the pH gradient ( $\Delta\text{pH} = \text{pHe} - \text{pHi}$ ) across the erythrocyte membrane of arterial (○) and venous (●) blood at rest (R) and 0, 0.5, 1 and 4 h following exercise in *Petromyzon marinus*. The dashed lines represent the 5 min period of exercise. Values are means  $\pm$  standard error ( $N=6$ ). Asterisks denote a significant difference from the resting value ( $P < 0.05$ ).

different from rest after 0.5 h. In contrast, arterial  $C_{\text{CO}_2, \text{i}}$  increased significantly by  $3.0 \text{ mmol l}^{-1}$  and venous  $C_{\text{CO}_2, \text{i}}$  increased significantly by  $9.4 \text{ mmol l}^{-1}$  following exercise (Fig. 4B). These changes represent increases of 60% and 104% in

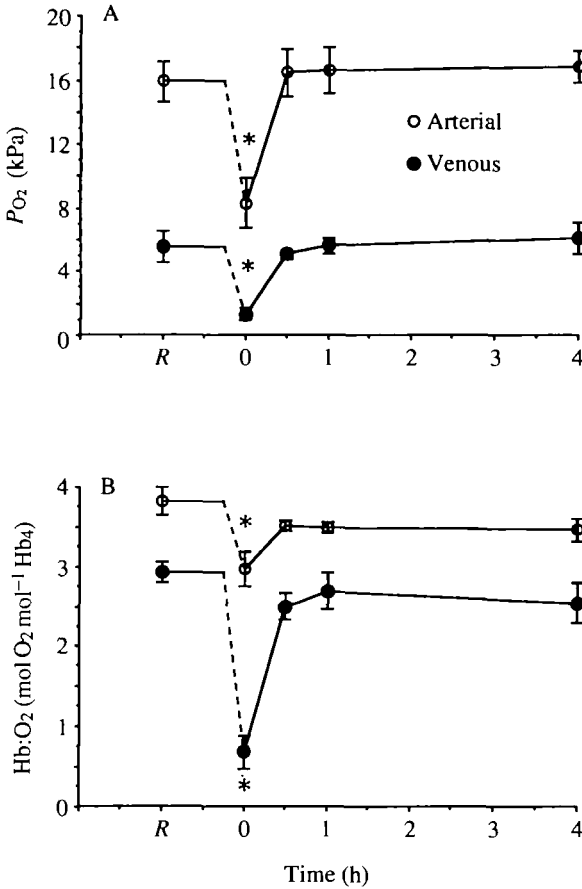

Fig. 2. (A) Oxygen tension ( $P_{O_2}$ ) and (B) hemoglobin oxygen-carriage (Hb:O<sub>2</sub>) in arterial (○) and venous (●) blood at rest (R) and 0, 0.5, 1 and 4 h following exercise in *Petromyzon marinus*. Values are means  $\pm$  standard error ( $N=6$ ). Asterisks denote a significant difference from the resting value ( $P<0.05$ ).

arterial and venous  $C_{CO_2,i}$ , respectively. The  $C_{CO_2,i}$  in both compartments had returned to values which were no longer significantly different from rest by 0.5 h. No significant differences were observed in plasma or erythrocyte chloride concentrations or erythrocyte water contents between arterial and venous blood either at rest or immediately after exercise (Table 1).

The partitioning between plasma and erythrocytes of the total CO<sub>2</sub> in 1l of arterial or venous whole blood can be calculated from the  $C_{CO_2}$  of plasma and erythrocytes and the hematocrit values (Fig. 5). In arterial blood at rest, the plasma accounted for 84% of the total CO<sub>2</sub>. After exercise, however, there was a significant decrease in the amount of CO<sub>2</sub> carried by the plasma (Fig. 5A). Thus, at 0 h, the importance of the erythrocytes in CO<sub>2</sub> carriage has increased and the plasma component of the total CO<sub>2</sub> in arterial blood fell to 75%. For the remainder of the recovery period, the amount of CO<sub>2</sub> carried by the plasma was

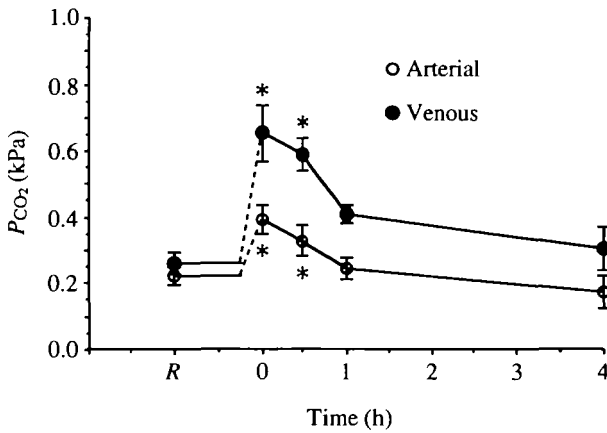

Fig. 3.  $\text{CO}_2$  tension ( $P_{\text{CO}_2}$ ) in arterial (○) and venous (●) blood at rest (R) and 0, 0.5, 1 and 4 h following exercise in *Petromyzon marinus*. The dashed lines represent the 5 min period of exercise. Values are means  $\pm$  standard error ( $N=6$ ). Asterisks denote significant differences from resting values ( $P<0.05$ ).

not significantly different from that at rest. The percentage of  $\text{CO}_2$  in the plasma increased somewhat throughout the recovery period, but this was due to a reduction in the hematocrit caused by sampling. Hematocrits of resting lampreys were  $27.4 \pm 2.3\%$ , but they consistently declined after each sample. Immediately after exercise, mean hematocrit had fallen to  $24.5 \pm 2.6\%$  and by the end of the experiment, it was  $19.2 \pm 2.8\%$ . Thus, in the present analysis, it should be considered that, after the resting sample, the total  $\text{CO}_2$  attributable to the erythrocytes will be somewhat underestimated. In venous blood, 78% of the  $\text{CO}_2$  is carried within the plasma at rest (Fig. 5B). Similar to the trend in arterial blood, exercise was associated with a significant increase in the amount of  $\text{CO}_2$  within the erythrocytes in venous blood. In this case, the  $\text{CO}_2$  partitioned within the erythrocytes increased to 38% of the total and the plasma component, therefore, fell to 62%. During the remainder of the recovery period, the plasma  $\text{CO}_2$

Table 1. Chloride concentration in erythrocytes ( $[\text{Cl}^-]_i$ ) and plasma ( $[\text{Cl}^-]_{pl}$ ) and erythrocyte water content (%  $\text{H}_2\text{O}$ ) in arterial and venous blood at rest and following exercise in *Petromyzon marinus*

|                                         | Rest                |                     | Exercise            |                     |
|-----------------------------------------|---------------------|---------------------|---------------------|---------------------|
|                                         | Arterial            | Venous              | Arterial            | Venous              |
| $[\text{Cl}^-]_i$ (mequiv $l^{-1}$ )    | $52.6 \pm 2.0$ (6)  | $55.0 \pm 0.8$ (6)  | $56.3 \pm 1.3$ (6)  | $58.0 \pm 1.0$ (6)  |
| $[\text{Cl}^-]_{pl}$ (mequiv $l^{-1}$ ) | $118.4 \pm 1.7$ (6) | $120.7 \pm 4.4$ (6) | $117.7 \pm 2.6$ (6) | $118.0 \pm 2.2$ (6) |
| $\text{H}_2\text{O}$ (%)                | $67.2 \pm 0.5$ (5)  | $67.7 \pm 0.4$ (5)  | $66.8 \pm 0.3$ (6)  | $66.5 \pm 0.3$ (6)  |

All values are means  $\pm$  standard error ( $N$ ).

There are no significant ( $P<0.05$ ) differences between arterial and venous values at rest or after exercise.



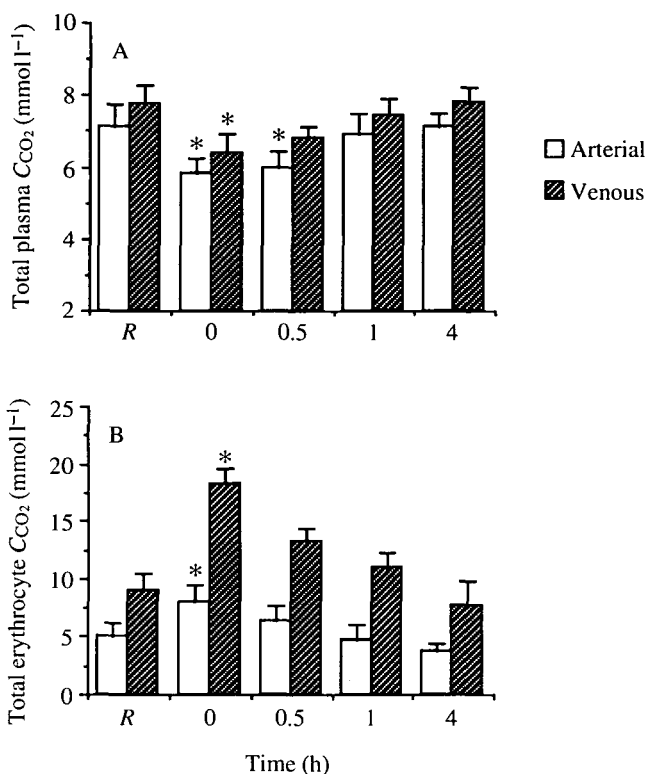

Fig. 4. Total CO<sub>2</sub> concentration of (A) true plasma and (B) erythrocytes in arterial (open bars) and venous (hatched bars) blood at rest (R) and 0, 0.5, 1 and 4 h following exercise in *Petromyzon marinus*. Values are means+standard error (N=6). Asterisks denote significant differences from resting values (P<0.05).

component returned to resting values and then slightly increased, again reflecting the reduction in hematocrit caused by sampling.

It is also possible to determine the relative contribution of changes in  $C_{\text{CO}_2, \text{i}}$  and  $C_{\text{CO}_2, \text{t.pl.}}$  to the difference in CO<sub>2</sub> content between arterial and venous whole blood. In contrast to the previous analysis, this will indicate the relative importance of the erythrocytes and the plasma in the transport of CO<sub>2</sub> from the metabolizing tissues to the gills and will also indicate the source (plasma *versus* erythrocytes) of the CO<sub>2</sub> excreted by the gills. This analysis showed that the majority (62 %) of the CO<sub>2</sub> added to the blood by the tissues at rest is transported by the erythrocytes (Fig. 6). Moreover, changes in  $C_{\text{CO}_2, \text{i}}$  account for 78 % of the CO<sub>2</sub> difference between arterial and venous whole blood after exercise. During the remainder of the recovery period, the involvement of the erythrocytes falls and it then declines further because of the hematocrit changes mentioned earlier.

### Discussion

Exhaustive exercise, in the sea lamprey, causes a considerable extracellular

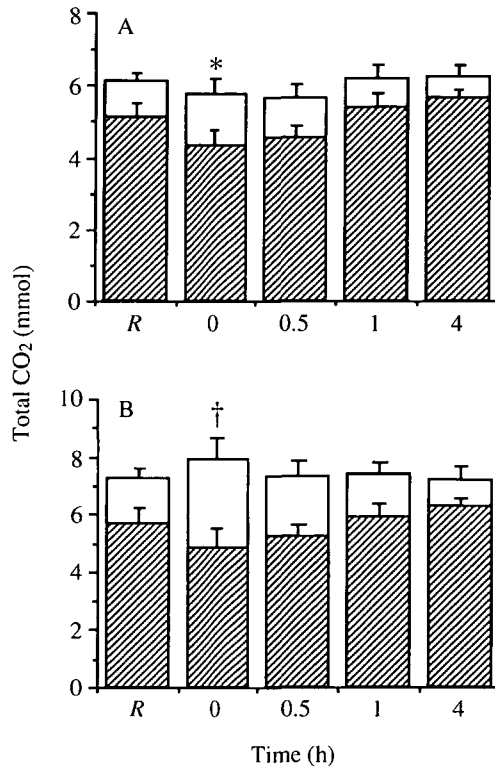

Fig. 5. Total CO<sub>2</sub> partitioned between plasma (hatched bars) and erythrocytes (open bars) in 11 of (A) arterial and (B) venous blood at rest (R) and 0, 0.5, 1 and 4 h following exercise in *Petromyzon marinus*. Values are means±standard error (N=6). An asterisk denotes a significant difference from the resting value for plasma. A dagger denotes a significant difference from the resting value for erythrocytes (P<0.05).

acidosis (Tufts, 1991; Fig. 1A). Previously, Tufts (1991) demonstrated that arterial pHi was maintained during the extracellular acidosis following exercise in the sea lamprey. The present results indicate that this is also the case in venous blood (Fig. 1B). In fact, venous pHi is consistently higher than arterial pHi. The pH gradient across the erythrocyte membrane is therefore smaller in venous blood and becomes reversed after exercise (Fig. 1C). One can speculate that the maintenance of venous pHi may be beneficial for oxygen uptake following exercise. Conversely, the absence of significant reductions in venous pHi could also have a deleterious effect on oxygen delivery to the tissues by minimizing the impact of the Bohr effect on haemoglobin oxygen-carriage.

In the river lamprey, *Lampetra fluviatilis*, Na<sup>+</sup>/H<sup>+</sup> exchange is involved in the regulation of erythrocyte pH *in vitro* (Nikinmaa, 1986; Nikinmaa *et al.* 1986). Recently, Tufts (1992) demonstrated that erythrocyte pH in the sea lamprey, *Petromyzon marinus*, may also be determined by a sodium-dependent mechanism *in vitro*. It is possible, therefore, that the observed regulation of pHi after exercise

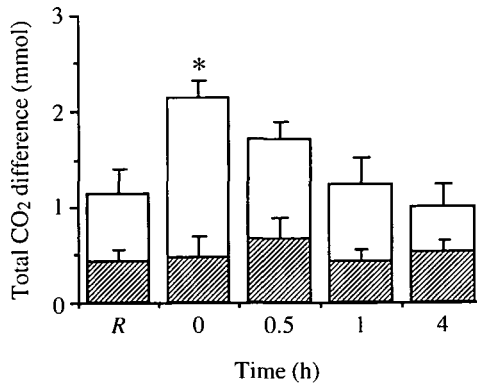

Fig. 6. Total CO<sub>2</sub> difference between 11 of arterial and venous whole blood partitioned between plasma (hatched bars) and erythrocytes (open bars) at rest (*R*) and 0, 0.5, 1 and 4 h following exercise in *Petromyzon marinus*. Values are means±standard error ( $N=6$ ). An asterisk denotes a significant difference from the resting value for erythrocytes.

*in vivo* involves the activation of ion transport processes across the red cell membrane. In addition, a considerable Haldane effect is present in the blood of both of these lamprey species (Nikinmaa and Matsoff, 1991; R. A. Ferguson, N. Sehdev, B. Bagatto and B. L. Tufts, unpublished data). Thus, deoxygenation of hemoglobin and associated buffering of H<sup>+</sup> probably contributes both to the differences in pH<sub>i</sub> between arterial and venous blood and to the maintenance of pH<sub>i</sub> immediately following exercise in *P. marinus*. In this regard, Fig. 2 illustrates the measured differences in  $P_{O_2}$  and haemoglobin oxygen-carriage between arterial and venous blood and highlights the significant decreases in these variables immediately after exercise.

Titration of plasma bicarbonate by protons would account for the observed increase in arterial and venous  $P_{CO_2}$  after exercise (Tufts, 1991; Fig. 3). A post-exercise increase in CO<sub>2</sub> production by the tissues undoubtedly contributes further to the greater elevation in venous  $P_{CO_2}$  (Fig. 3). As noted previously by Tufts (1991), it should be remembered that these  $P_{CO_2}$  values have been calculated. Thus, while relative differences will be reflected in these values, the absolute values may be somewhat different if, for any reason, the CO<sub>2</sub> reactions in the plasma have not reached equilibrium. Titration of plasma bicarbonate by protons could also explain the reductions in  $C_{CO_2,t.pl.}$  of both arterial and venous blood after exercise (Fig. 4A). The changes in  $C_{CO_2,i}$ , however, are markedly different from those in the plasma. In arterial and venous blood, exercise causes a significant increase in  $C_{CO_2,i}$  (Fig. 4B). In venous blood,  $C_{CO_2,i}$  at 0 h was more than double the resting value. An increase in  $C_{CO_2,i}$  after exercise would be expected because pH<sub>i</sub> is maintained at a time when  $P_{CO_2}$  is increased. However, the increase in  $C_{CO_2,i}$  in venous blood is well above that predicted from the CO<sub>2</sub> dissociation curves for sea lamprey erythrocytes (Tufts and Boutilier, 1989, 1990).

This discrepancy can probably be attributed to the Haldane effect in sea lamprey blood (Nikinmaa and Matsoff, 1991; R. A. Ferguson, N. Sehdev, B. Bagatto and B. L. Tufts, unpublished data). Venous haemoglobin oxygen-carriage falls by 76% immediately after exercise (Fig. 2B). In venous blood, the amount of bicarbonate formed within the erythrocyte at any given  $P_{\text{CO}_2}$  will therefore be greater than that in arterial blood as a result of the increased number of protons which can be buffered by deoxygenated hemoglobin.

In most vertebrates, a large portion of the bicarbonate formed after hydration of  $\text{CO}_2$  within the erythrocyte is transferred to the plasma in exchange for chloride (Roughton, 1964; Cameron, 1979; Perry, 1986; Swenson, 1990). In the rainbow trout, this process results in arteriovenous differences in erythrocyte chloride concentration of  $15 \text{ mmol l}^{-1}$  at rest and  $22 \text{ mmol l}^{-1}$  after exercise (Nikinmaa and Jensen, 1986). *In vitro* studies have indicated that chloride/bicarbonate exchange may be absent or very limited in agnathan erythrocytes (Ellory *et al.* 1987; Nikinmaa and Railo, 1987). However, there has been no *in vivo* evidence to support this view. Furthermore, the characteristics of  $\text{CO}_2$  transport and acid-base regulation in arterial blood of the sea lamprey after exercise are not markedly different from those of other lower vertebrates (Tufts, 1991). In the present study, there are no significant differences in erythrocyte chloride concentration or erythrocyte water content between arterial and venous blood at rest or after exercise (Table 1). Thus, unless erythrocyte chloride is rapidly redistributed across the erythrocyte membrane by some other mechanism, these results indicate that the importance of erythrocyte chloride/bicarbonate exchange for  $\text{CO}_2$  transport *in vivo* in the sea lamprey must be minimal. It should also be noted that the present values for erythrocyte chloride concentration are considerably higher than those reported by Tufts and Boutilier (1989). Extraction of dried samples with nitric acid, as in Boutilier and Tufts (1989), was later found to be an ineffective method for the determination of chloride concentrations in lamprey erythrocytes (B. L. Tufts and R. G. Boutilier, unpublished data). The large increase in  $C_{\text{CO}_2, \text{i}}$  in venous blood after exercise may be further evidence that there is minimal exchange of chloride and bicarbonate across the erythrocyte membrane *in vivo* (Fig. 4B). In most vertebrates, much of the bicarbonate formed within the erythrocyte under these conditions would be redistributed to the plasma in exchange for chloride. Since erythrocyte chloride concentrations do not change significantly after exercise, one can predict that the majority of the bicarbonate formed within the erythrocyte would remain within the cytosol and, as observed, result in a very large increase in venous  $C_{\text{CO}_2, \text{i}}$  after exercise.

*In vitro* analyses of  $\text{CO}_2$  transport in sea lamprey blood suggest that the erythrocytes carry a much greater proportion of  $\text{CO}_2$  than in other vertebrates (Tufts and Boutilier, 1989, 1990). Based on these results, Tufts and Boutilier (1989) built a predictive model for  $\text{CO}_2$  in sea lampreys which primarily involves carriage by erythrocytes. Simply, bicarbonate formed within the erythrocyte would remain there until the blood reaches the gills. At this point, the intracellular bicarbonate would combine with a proton to be excreted as  $\text{CO}_2$ . The present

results can now be used to compare the relative importance of the erythrocyte and the plasma for CO<sub>2</sub> transport *in vivo*.

In resting sea lampreys, only 16 % of the total CO<sub>2</sub> present in arterial blood can be attributed to the erythrocytes. In venous blood, this percentage is somewhat greater (22 %), but the majority of the CO<sub>2</sub> is found in the plasma. By comparison, calculations based on data from Nikinmaa (1990) indicate that the erythrocytes can account for approximately 20 % of the total CO<sub>2</sub> in both arterial and venous blood in humans. In rainbow trout, which have a hematocrit closer to that of sea lampreys, the erythrocytes carry about 8 and 10 % of the total CO<sub>2</sub> in arterial and venous blood, respectively (Heming, 1984). Similarly, in the amphibian *Bufo marinus*, the erythrocytes account for about 10 % of the total CO<sub>2</sub> present in arterial blood at rest (Boutilier *et al.* 1979). Thus, under resting conditions, the distribution of total CO<sub>2</sub> between plasma and erythrocytes in arterial and venous blood of the sea lamprey is not markedly different from that in mammals, but the proportion carried in the erythrocytes appears to be somewhat greater than that in other lower vertebrates. Immediately after exercise, there are significant increases in  $C_{\text{CO}_2, \text{i}}$  in arterial and venous blood and significant decreases in  $C_{\text{CO}_2, \text{t.pl.}}$ . This causes a change in the partitioning of CO<sub>2</sub> between plasma and erythrocytes in the sea lamprey (Figs 4, 5). The percentage of total CO<sub>2</sub> partitioned within the erythrocytes increases to 25 % in arterial blood and 38 % in venous blood, despite the fact that repetitive blood sampling resulted in a small decrease in hematocrit. The reported contribution of the erythrocytes will, therefore, be marginally underestimated. Thus, a considerable amount of the total CO<sub>2</sub> in sea lamprey blood is partitioned within the erythrocytes after exercise, particularly in the venous system.

When the total CO<sub>2</sub> differences between arterial and venous blood are analyzed, the actual contribution of the erythrocytes to 'CO<sub>2</sub> transport' in the sea lamprey becomes more apparent. At rest, 62 % of the difference between arterial and venous whole-blood  $C_{\text{CO}_2}$  can be attributed to changes in  $C_{\text{CO}_2}$  between arterial and venous erythrocytes. Even though the erythrocytes represent a much smaller fraction of the whole blood than the plasma, the difference in  $C_{\text{CO}_2, \text{i}}$  between arterial and venous blood is much greater (4.0 mmol) than it is in the plasma (0.6 mmol; Fig. 4). In comparison, Heming (1984) reported that 82 % of the difference in whole-blood  $C_{\text{CO}_2}$  across the gills of rainbow trout was caused by changes in plasma bicarbonate concentration, whereas changes in red cell bicarbonate concentration accounted for only 8 % of the arteriovenous  $C_{\text{CO}_2}$  difference. Table 2 summarizes the arteriovenous differences for variables relevant to CO<sub>2</sub> transport in the sea lamprey and compares them to values for the rainbow trout. When the total CO<sub>2</sub> differences between arterial and venous blood are compared, the present *in vivo* experiments support the view that the strategy for CO<sub>2</sub> transport in sea lampreys may be markedly different from that in other vertebrates. After exercise, the difference in  $C_{\text{CO}_2, \text{i}}$  between arterial and venous blood is even greater (Fig. 4B). At 0 h post-exercise, these differences account for 78.3 % of the total CO<sub>2</sub> difference between arterial and venous whole blood,

Table 2. Comparison of resting arteriovenous differences in the sea lamprey and the rainbow trout

|                                                                                         | Sea lamprey | Rainbow trout     |
|-----------------------------------------------------------------------------------------|-------------|-------------------|
| Total arteriovenous difference in CO <sub>2</sub><br>(mmol l <sup>-1</sup> blood)       | 1.13        | 0.99 <sup>1</sup> |
| Percentage of total arteriovenous difference<br>in CO <sub>2</sub> from plasma          | 38          | 85 <sup>1</sup>   |
| Percentage of total arteriovenous difference<br>in CO <sub>2</sub> from red blood cells | 62          | 15 <sup>1</sup>   |
| Δrbc arteriovenous [Cl <sup>-</sup> ] (mequiv l <sup>-1</sup> )                         | 2.4         | 15.0 <sup>2</sup> |
| Δplasma arteriovenous [Cl <sup>-</sup> ] (mequiv l <sup>-1</sup> )                      | 2.3         | 2.0 <sup>2</sup>  |
| Hematocrit (%)                                                                          | 27.4        | 23.2 <sup>2</sup> |

<sup>1</sup> Data from Heming (1984) and <sup>2</sup> data from Nikinmaa and Jensen (1986).

indicating that the role of the erythrocyte in CO<sub>2</sub> carriage is even more important after exercise in sea lampreys.

In conclusion, the present results indicate that the pattern of CO<sub>2</sub> transport in sea lampreys *in vivo* is markedly different from the standard model of CO<sub>2</sub> transport in vertebrates. As proposed by Tufts and Boutilier (1989), CO<sub>2</sub> transport in the sea lamprey *in vivo* is largely dependent on erythrocyte CO<sub>2</sub> carriage. In view of the phylogenetically primitive position of lampreys, one can speculate that this may represent an early stage in the evolution of gas transport. Transport of bicarbonate within the erythrocyte, however, appears to minimize the changes in pHi that are normally present in other vertebrates. Thus, a possible selective pressure for the evolution of the strategy of CO<sub>2</sub> transport present in most vertebrates may have been to maximize the impact of the Bohr effect in O<sub>2</sub> delivery.

This study was supported by an NSERC Operating Grant to B.L.T. and an NSERC Summer Award to B.B. The authors would also like to thank the Lamprey Control Center (Department of Fisheries and Oceans) in Sault Ste Marie, Ontario, for their assistance in obtaining the sea lampreys.

### References

- BOUTILIER, R. G., HEMING, T. A. AND IWAMA, G. K. (1984). Physico-chemical parameters for use in fish respiratory physiology. In *Fish Physiology*, vol XA (ed. W. S. Hoar and D. J. Randall), pp. 401–430. New York: Academic Press.
- BOUTILIER, R. G., RANDALL, D. J., SHELTON, G. AND TOEWS, D. P. (1979). Acid-base relationships in the blood of the toad, *Bufo marinus*. I. The effects of environmental CO<sub>2</sub>. *J. exp. Biol.* **82**, 331–344.
- CAMERON, J. N. (1979). Excretion of CO<sub>2</sub> in water-breathing animals – a short review. *Mar. Biol. Lett.* **1**, 3–13.
- DRABKIN, D. L. AND AUSTIN, J. H. (1935). Spectrophotometric studies. II. Preparations from washed blood cells; nitric oxide hemoglobin and sulfhemoglobin. *J. biol. Chem.* **112**, 51–65.
- ELLORY, J. C., WOLOWYK, M. W. AND YOUNG, J. D. (1987). Hagfish (*Eptatretus stouti*) erythrocytes show minimal chloride transport activity. *J. exp. Biol.* **129**, 377–383.

- HEMING, T. A. (1984). The role of fish erythrocytes in transport and excretion of carbon dioxide. PhD thesis, University of British Columbia, Vancouver, BC. 177pp.
- KLOCKE, R. A. (1987). Carbon dioxide transport. In *Handbook of Physiology*, section 3, *The Respiratory System*, vol. 4, *Gas Exchange* (ed. L. E. Farhi and S. M. Tenney), pp. 173–197. Bethesda, Maryland: American Physiological Society.
- NIKINMAA, M. (1986). Red cell pH of lamprey (*Lampetra fluviatilis*) is actively regulated. *J. comp. Physiol. B* **156**, 747–750.
- NIKINMAA, M. (1990). *Vertebrate Red Blood Cells*. Berlin, Heidelberg: Springer Verlag. 262pp.
- NIKINMAA, M. AND JENSEN, F. B. (1986). Blood oxygen transport and acid–base status of stressed trout (*Salmo gairdneri*): pre- and postbranchial values in winter fish. *Comp. Biochem. Physiol.* **84A**, 391–396.
- NIKINMAA, M., KUNNAMO-OJALA, T. AND RAILO, R. E. (1986). Mechanisms of pH regulation in lamprey (*Lampetra fluviatilis*) red blood cells. *J. exp. Biol.* **122**, 355–367.
- NIKINMAA, M. AND MATSOFF, L. (1991). Effects of oxygen saturation on the CO<sub>2</sub> transport properties of *Lampetra* red cells. *Respir. Physiol.* (in press).
- NIKINMAA, M. AND RAILO, R. E. (1987). Anion movements across lamprey (*Lampetra fluviatilis*) red cell membrane. *Biochim. biophys. Acta* **899**, 134–136.
- PERRY, S. F. (1986). Carbon dioxide excretion in fishes. *Can. J. Zool.* **64**, 565–572.
- ROUGHTON, F. J. W. (1964). Transport of oxygen and carbon dioxide. In *Handbook of Physiology*, vol. 1 (ed. W. O. Fenn and H. Rahn), pp. 767–825. Washington, DC: American Physiological Society.
- SWENSON, E. R. (1990). Kinetics of oxygen and carbon dioxide exchange. In *Advances in Comparative Environmental Physiology*, vol. 6 (ed. R. G. Boutilier), pp. 163–210. Berlin, Heidelberg: Springer-Verlag.
- TUCKER, V. A. (1967). Method for oxygen content and dissociation curves on microliter blood samples. *J. appl. Physiol.* **23**, 410–414.
- TUFTS, B. L. (1991). Acid–base regulation and blood gas transport following exhaustive exercise in an agnathan, the sea lamprey, *Petromyzon marinus*. *J. exp. Biol.* **159**, 371–385.
- TUFTS, B. L. (1992). Sodium-dependent pH regulation in sea lamprey (*Petromyzon marinus*) red blood cells. *Can. J. Zool.* (in press).
- TUFTS, B. L. AND BOUTILIER, R. G. (1989). The absence of rapid chloride/bicarbonate exchange in lamprey erythrocytes: implications for CO<sub>2</sub> transport and ion distributions between plasma and erythrocytes in the blood of *Petromyzon marinus*. *J. exp. Biol.* **144**, 565–576.
- TUFTS, B. L. AND BOUTILIER, R. G. (1990). CO<sub>2</sub> transport in agnathan blood: evidence of erythrocyte Cl<sup>-</sup>/HCO<sub>3</sub><sup>-</sup> exchange limitations. *Respir. Physiol.* **80**, 335–348.
- ZEIDLER, R. AND KIM, H. D. (1977). Preferential hemolysis of postnatal calf red cells induced by internal alkalization. *J. gen. Physiol.* **70**, 385–401.
